# Supplementary material
Source: HighWire-hosted journal article supplement (https://www.jrheum.org/highwire/filestream/42324/field_highwire_adjunct_files/0/220157DataSuppl.pdf)

**SUPPLEMENTARY MATERIALS****Supplementary Table S1.** Intervals and values of the measured observation data in clinical practice.

|        | No. of intervals | Mean (SD), day  | Median (IQR), day       |
|--------|------------------|-----------------|-------------------------|
| CRP    | 7196             | 193.74 (169.77) | 181.00 (133.00, 206.00) |
| ESR    | 7070             | 197.61 (168.56) | 182.00 (142.00, 208.00) |
| ASDAS  | 1641             | 270.11 (224.72) | 189.00 (175.00, 224.00) |
| mSASSS | 1349             | 826.30 (328.49) | 749.00 (677.00, 880.00) |

SD, standard deviation; IQR, interquartile range; CRP, C-reactive protein; ESR, erythrocyte sedimentation rate; ASDAS, Ankylosing Spondylitis Disease Activity Score; mSASSS, modified Stoke Ankylosing Spondylitis Spinal Score.

**Supplementary Table S2.** Summary of the variables from the 2,956 intervals treated with TNF inhibitors

| <b>Continuous variables</b> | <b>No. with data</b> | <b>Value</b>  |
|-----------------------------|----------------------|---------------|
| ESR, mean (SD), mm/hr       | 2,928                | 10.99 (15.29) |
| CRP, mean (SD), mg/dL       | 2,928                | 1.01 (0.78)   |
| ASDAS-CRP, mean (SD)        | 1,214                | 1.95 (0.42)   |
| mSASSS, mean (SD)           | 2,956                | 19.56 (20.36) |

SD, standard deviation; ESR, erythrocyte sedimentation rate; CRP, C-reactive protein; ASDAS, Ankylosing Spondylitis Disease Activity Score; mSASSS, modified Stoke Ankylosing Spondylitis Spinal Score.

**Supplementary Table S3.** Linear mixed model for the relationship between baseline mSASSS and mSASSS over time.

| Variables       | Beta estimate | 95% CI |        | p-value |
|-----------------|---------------|--------|--------|---------|
|                 |               | LB     | UB     |         |
| (Intercept)     | -0.603        | -0.961 | -0.244 | 0.001   |
| Baseline mSASSS | 1.025         | 1.012  | 1.039  | <0.001  |
| Time            | 0.432         | 0.409  | 0.454  | <0.001  |

mSASSS, modified Stoke Ankylosing Spondylitis Spinal Score; CI, confidence interval; LB, lower bound; UB, upper bound.

**Supplementary Table S4.** Beta coefficients of the lag inflammatory markers and mSASSS over time

| Lag       | CRP   |        |       | ESR   |        |       | ASDAS  |        |       |
|-----------|-------|--------|-------|-------|--------|-------|--------|--------|-------|
|           | Beta  | 95% CI |       | Beta  | 95% CI |       | Beta   | 95% CI |       |
|           |       | LB     | UB    |       | LB     | UB    |        | LB     | UB    |
| 0 months  | 0.056 | -0.272 | 0.383 | 0.059 | -0.081 | 0.199 | 0.358  | -0.043 | 0.760 |
| 6 months  | 0.253 | -0.110 | 0.616 | 0.079 | -0.083 | 0.241 | 0.411  | -0.062 | 0.884 |
| 12 months | 0.400 | 0.017  | 0.783 | 0.114 | -0.068 | 0.296 | 0.441  | -0.052 | 0.934 |
| 18 months | 0.650 | 0.249  | 1.052 | 0.151 | -0.047 | 0.350 | 0.317  | -0.145 | 0.780 |
| 24 months | 0.531 | 0.112  | 0.951 | 0.120 | -0.094 | 0.334 | -0.006 | -0.435 | 0.423 |
| 30 months | 0.495 | 0.055  | 0.935 | 0.083 | -0.150 | 0.317 | 0.203  | -0.300 | 0.706 |
| 36 months | 0.602 | 0.143  | 1.061 | 0.090 | -0.165 | 0.345 | 0.540  | -0.021 | 1.101 |

CRP, C-reactive protein; ESR, erythrocyte sedimentation rate; ASDAS, Ankylosing Spondylitis Disease Activity Score; CI, confidence interval; LB, lower bound; UB, upper bound.

**Supplementary Table S5.** Beta coefficients of the cumulative sum of inflammatory markers and mSASSS over time.

| Duration of the cumulative sum | CRP   |        |       | ESR   |        |       | ASDAS  |        |       |
|--------------------------------|-------|--------|-------|-------|--------|-------|--------|--------|-------|
|                                | Beta  | 95% CI |       | Beta  | 95% CI |       | Beta   | 95% CI |       |
|                                |       | LB     | UB    |       | LB     | UB    |        | LB     | UB    |
| 6 months                       | 0.034 | -0.025 | 0.093 | 0.014 | -0.011 | 0.039 | 0.087  | 0.021  | 0.153 |
| 12 months                      | 0.037 | 0.000  | 0.075 | 0.011 | -0.006 | 0.027 | 0.048  | 0.000  | 0.096 |
| 18 months                      | 0.041 | 0.011  | 0.070 | 0.013 | -0.001 | 0.026 | 0.031  | -0.014 | 0.077 |
| 24 months                      | 0.041 | 0.016  | 0.067 | 0.013 | 0.001  | 0.025 | 0.003  | -0.041 | 0.047 |
| 30 months                      | 0.037 | 0.014  | 0.060 | 0.013 | 0.002  | 0.025 | -0.025 | -0.070 | 0.021 |
| 36 months                      | 0.037 | 0.015  | 0.058 | 0.014 | 0.002  | 0.025 | -0.053 | -0.111 | 0.005 |

CRP, C-reactive protein; ESR, erythrocyte sedimentation rate; ASDAS, Ankylosing Spondylitis Disease Activity Score; CI, confidence interval; LB, lower bound;

UB, upper bound.

**Supplementary Figure S1. Changes in mSASSS at 6-month intervals in each patient during TNFi treatment.**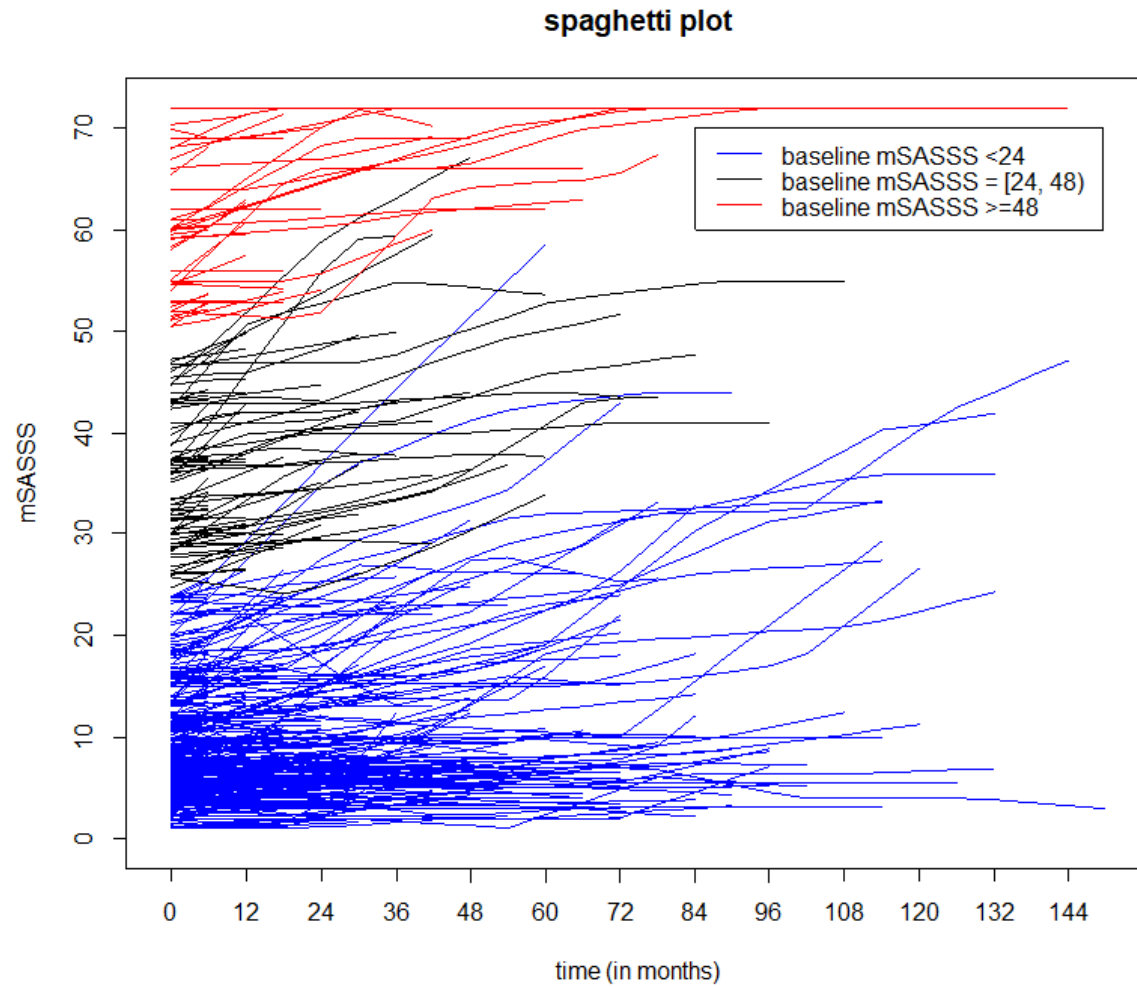

Supplement: 220157DataSuppl.pdf [file 220157DataSuppl.pdf]
